# Supplementary material for: In situ high pressure study of ZIF-8 by FTIR spectroscopy
Source: Royal Society of Chemistry journal article supplement (doi:10.1039/c1cc15525c), 2011-01-01
Supplement: c1cc15525c.pdf [file c1cc15525c.pdf]

Table S1. Pressure dependence ( $d\nu/dP$ ,  $\text{cm}^{-1}\cdot\text{GPa}^{-1}$ ) of IR modes of ZIF-8 on compression

| <b>Mode</b> | <b>Frequency (<math>\text{cm}^{-1}</math>)</b> | <b>0-1.6 GPa</b> | <b>1.6-12.8 GPa</b> |
|-------------|------------------------------------------------|------------------|---------------------|
| <b>1</b>    | 684                                            | 0.72             | 0.47                |
| <b>2</b>    | 693                                            | 2.89             |                     |
| <b>3</b>    | 758                                            | 2.40             | 2.32                |
| <b>4</b>    | 953                                            | -2.57            | 0.79                |
| <b>5</b>    | 995                                            | -1.00            | 0.95                |
| <b>6</b>    | 1146                                           | -3.34            | 1.98                |
| <b>7</b>    | 1180                                           | -0.02            | 2.48                |
| <b>8</b>    | 1310                                           | 1.23             | 2.27                |
| <b>9</b>    | 1584                                           | -4.42            | 1.27                |
